# Supplementary material for: Pt distribution-controlled Ni–Pt nanocrystalsviaan alcohol reduction technique for the oxygen reduction reaction
Source: Royal Society of Chemistry journal article supplement (doi:10.1039/d1nj01360b), 2021-01-01
Supplement: d1nj01360b1.pdf [file d1nj01360b1.pdf]

## Supplementary Information

### **Pt Distribution- Controlled Ni-Pt Nanocrystals via Alcohol Reduction Technique for Oxygen Reduction Reaction**

Kaneyuki Taniguchi,<sup>a</sup> Jhon L. Cuya Huaman,<sup>a</sup> Daichi Iwata,<sup>a</sup> Shun Yokoyama,<sup>b</sup>  
Takatoshi Matsumoto,<sup>c</sup> Kazumasa Suzuki,<sup>a</sup> Hiroshi Miyamura<sup>a</sup> and Balachandran  
Jeyadevan<sup>a\*</sup>

<sup>a</sup>Department of Materials Science, The University of Shiga Prefecture, Hikone, Shiga  
522-8533, Japan.

<sup>b</sup>Graduate School of Environmental Studies, Tohoku University, Sendai 980-8579,  
Japan.

<sup>c</sup>Institute of Multidisciplinary Research for Advanced Materials, Tohoku University,  
Sendai 980-8577, Japan.

\*Corresponding author. E-mail: [jeyadevan.b@mat.usp.ac.jp](mailto:jeyadevan.b@mat.usp.ac.jp)

Tel: +81-749-28-8352 Fax: +81-749-28-8486

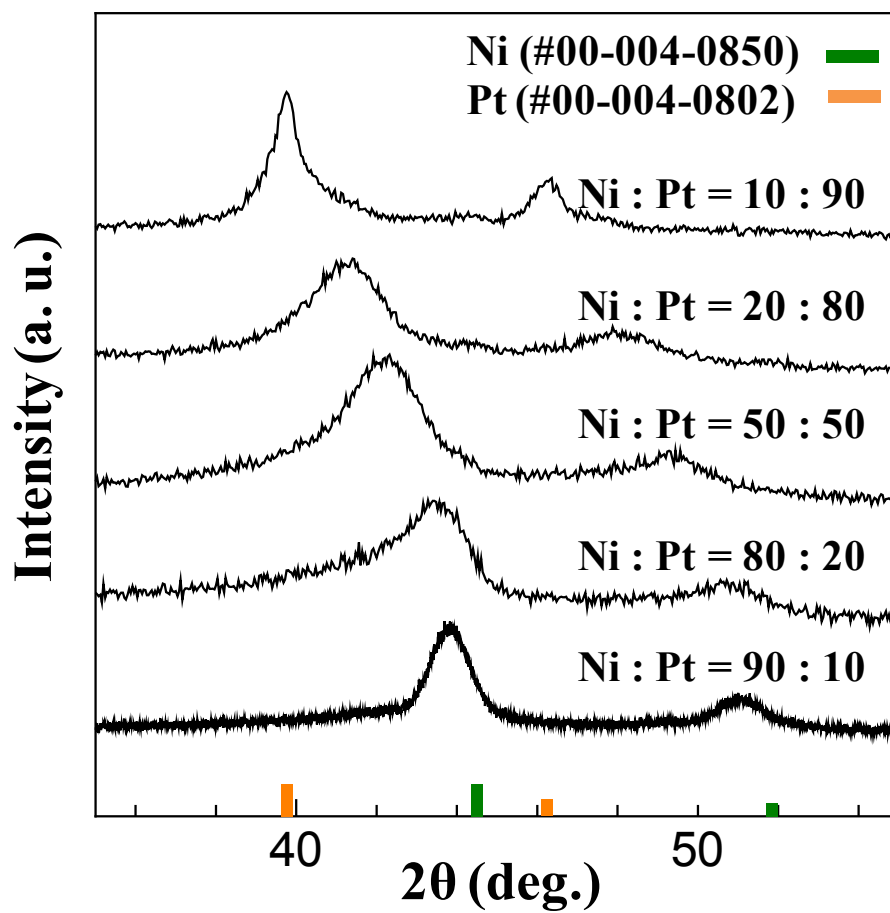

**Fig. S1** XRD patterns of Ni-Pt alloy NPs synthesized using different Ni:Pt precursor ratios.

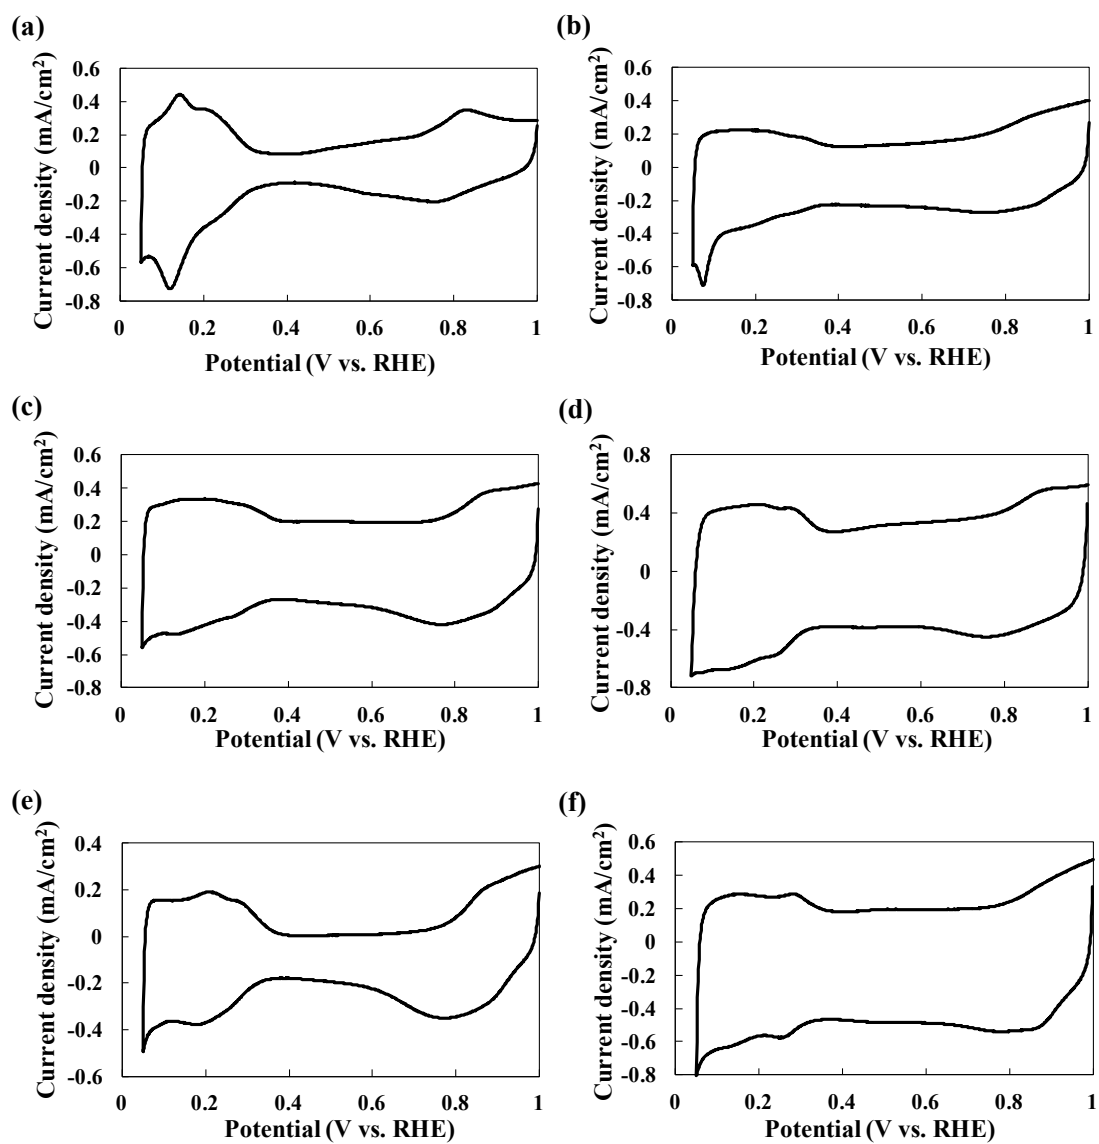

**Fig. S2** Cyclic voltammograms of (a) commercial Pt catalyst, (b) Ni<sub>93</sub>Pt<sub>7</sub>/C, (c) Ni<sub>86</sub>Pt<sub>14</sub>/C, (d) Ni<sub>74</sub>Pt<sub>26</sub>/C, (e) Ni<sub>50</sub>Pt<sub>50</sub>/C and (f) Ni<sub>27</sub>Pt<sub>73</sub>/C.

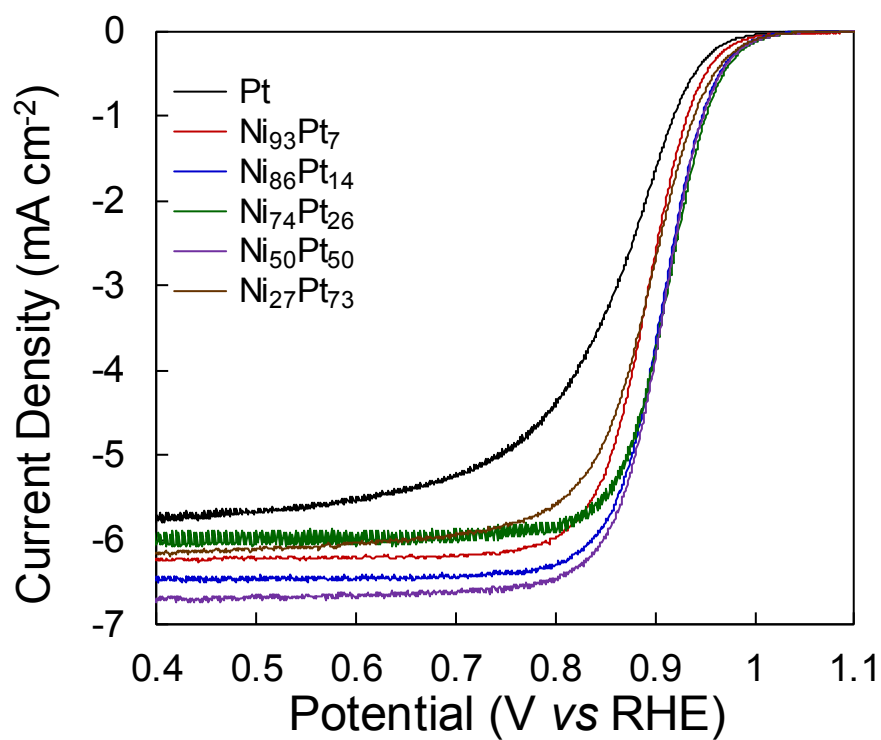

**Fig. S3** LSV curves of C-supported Pt and Ni-Pt alloy NPs with varying Pt concentrations.

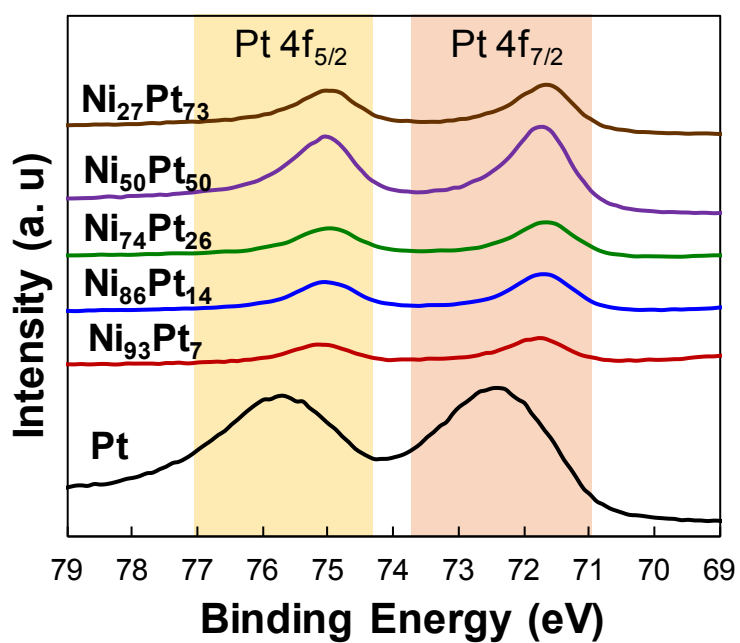

**Fig. S4** XPS spectra of Pt 4f for various compositions of Ni-Pt nanoparticles with different compositions.

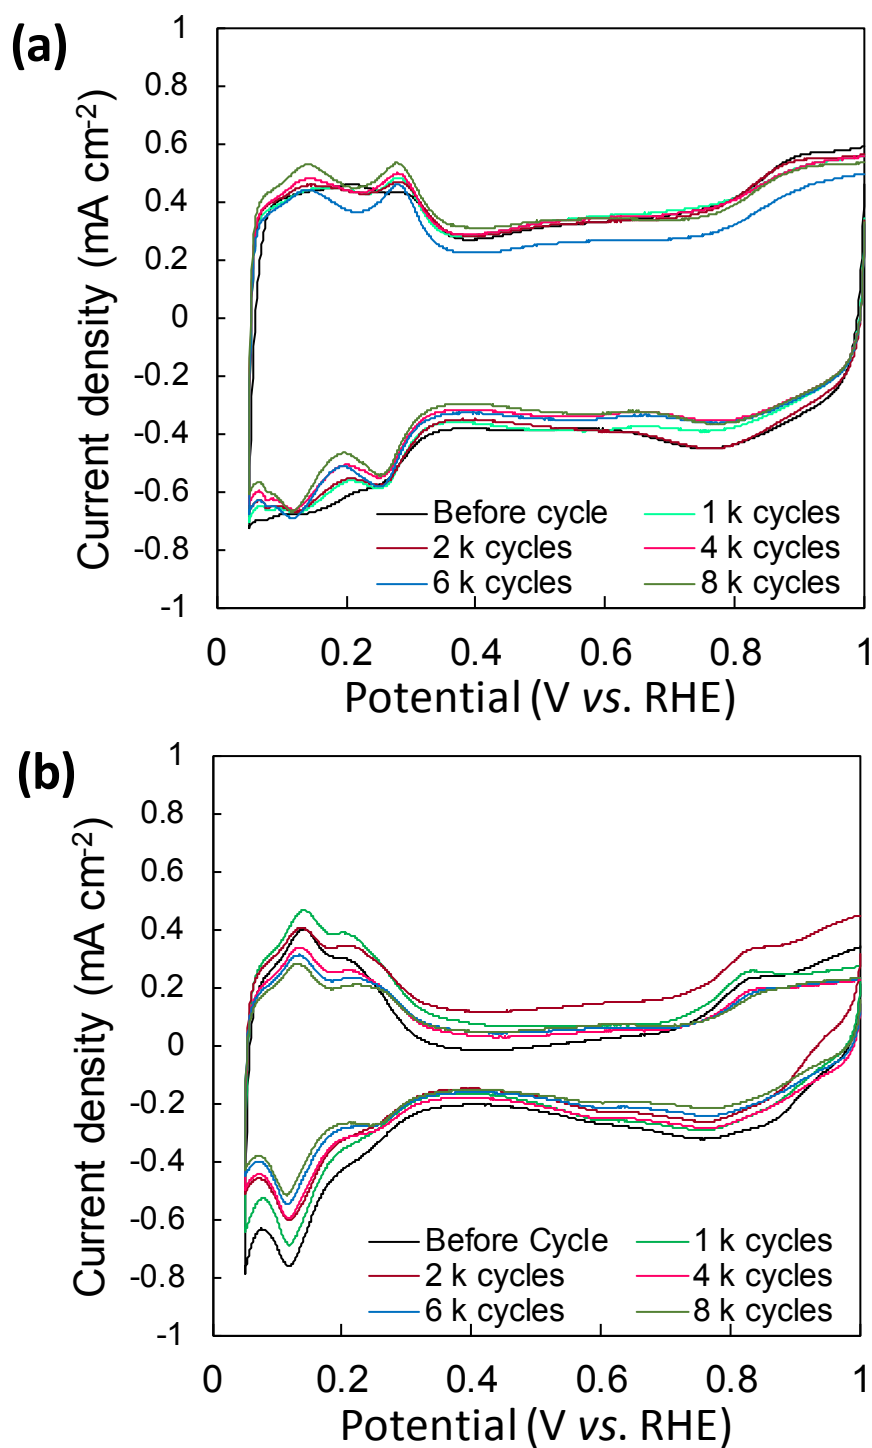

**Fig. S5** Cyclic voltammograms of (a) commercial Pt and (b) Pt coated Ni-Pt alloy NPs measured at different numbers of cycles.

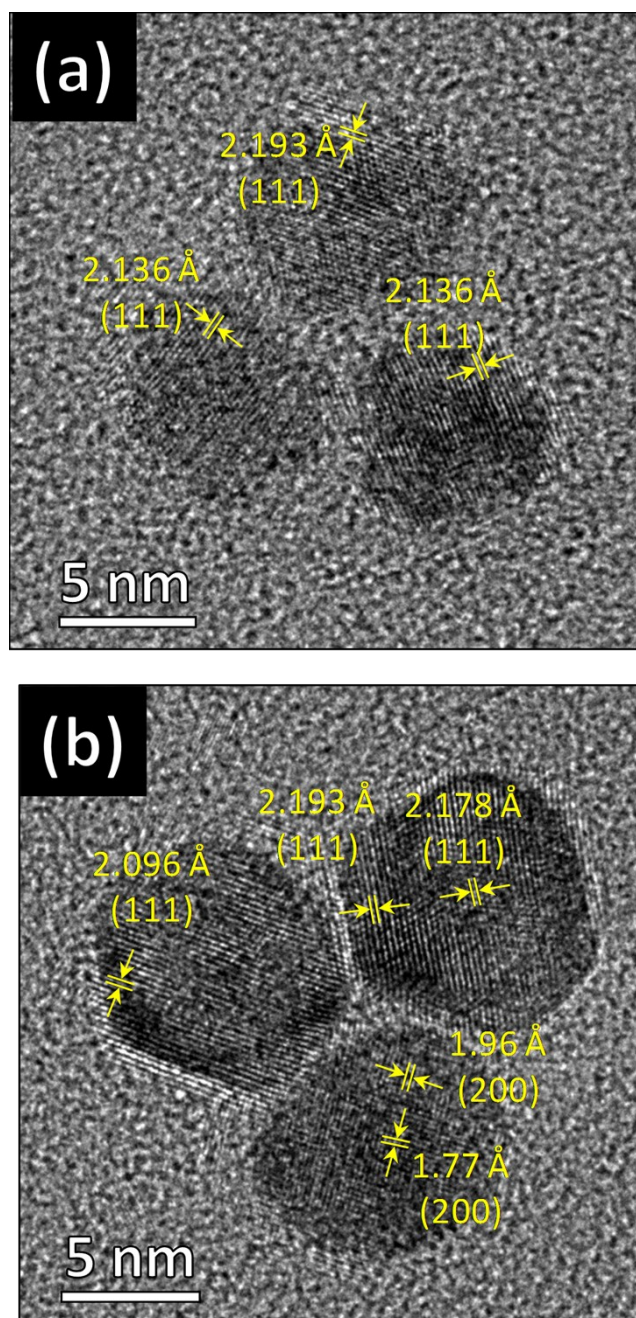

**Fig. S6** HRTEM images of Ni-Pt alloy NPs (a) before and (b) after Pt coating.

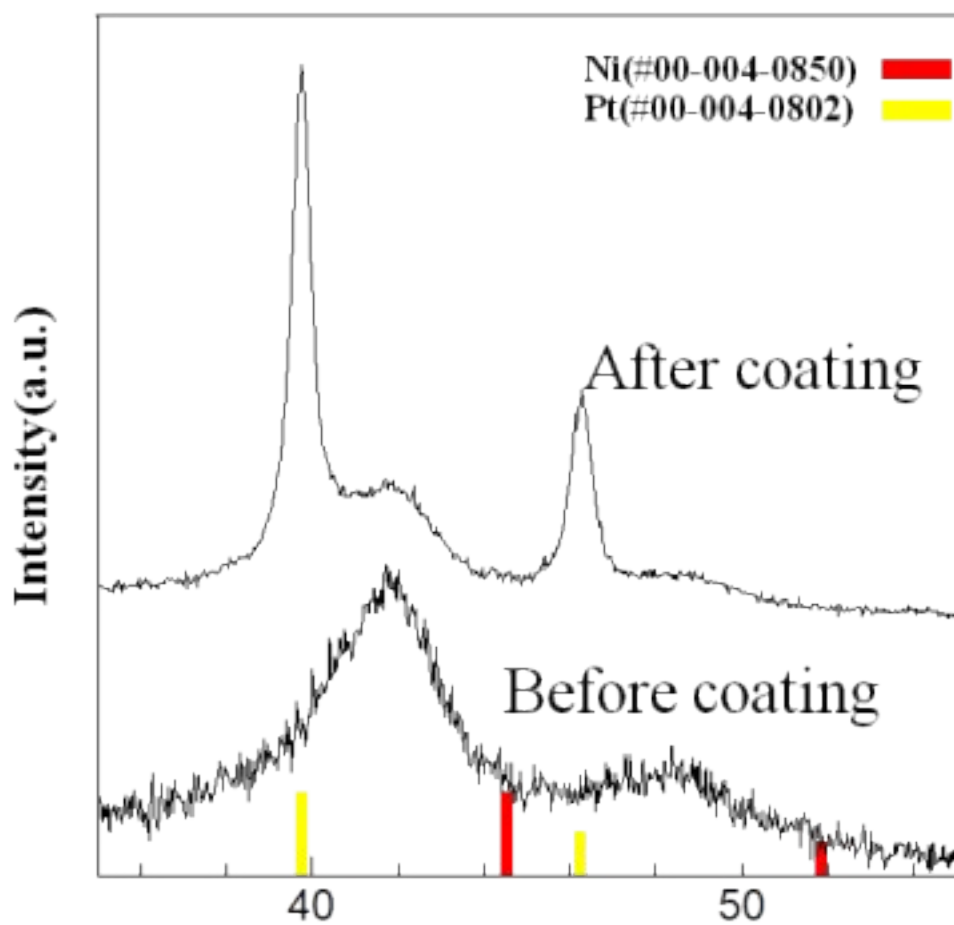

**Fig. S7** XRD patterns of Ni-Pt nanoparticles before and after Pt coating by adding OAm and Pt precursor (OAm/Pt ratio = 5.0) mixed for 6h at 160 °C.

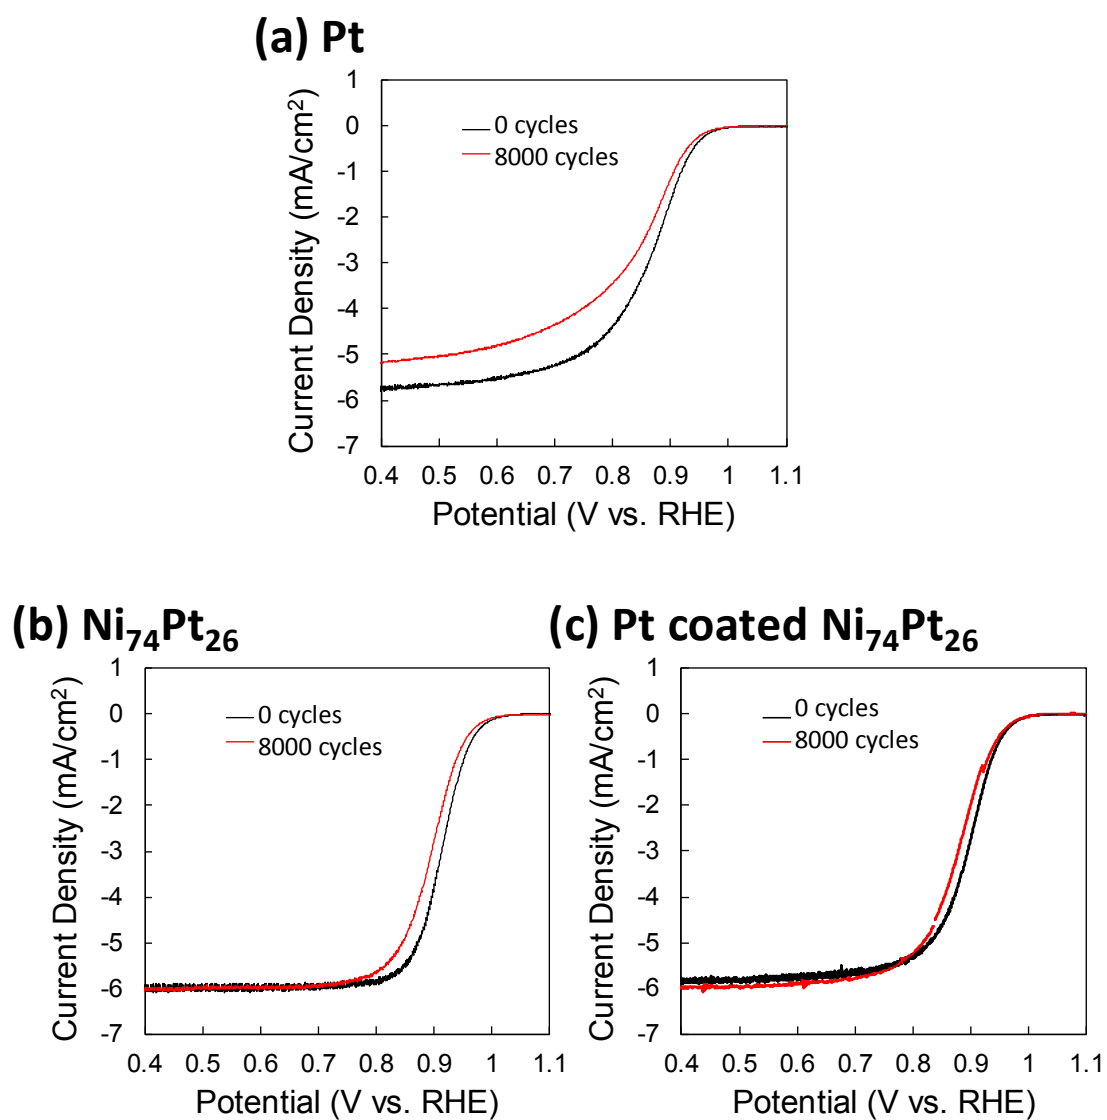

**Fig. S8** LSV curves of (a) C-supported Pt and Ni-Pt alloy NPs (b) before coating and (c) after coating measured after 8000 cycles of catalytic treatment.
